# Supplementary material for: Allocating constraint tasks schedules to promote on-demand cloud services by utilizing the Hungarian Algorithm
Source: PeerJ journal article supplement (doi:10.7717/peerj-cs.3385), 2025-12-16
Supplement: dataSet.xlsx [file dataSet.xlsx]

## Sheet: DataSet_1
Row	0	1	2	3
0	70	40	20	55
1	65	60	45	90
2	30	45	50	75
3	25	30	55	40

## Sheet: DataSet_2
Row	0	1	2	3
0	73	43	24	57
1	60	60	46	95
2	30	45	50	75
3	25	35	56	41

## Sheet: DataSet_3
Row	0	1	2	3
0	65	60	45	95
1	30	40	45	90
2	39	40	59	75
3	25	39	55	40

## Sheet: DataSet_4
Row	0	1	2	3
0	25	30	55	40
1	30	45	50	75
2	44	55	57	75
3	50	20	10	40

## Sheet: DataSet_5
Row	0	1	2	3
0	700	410	240	505
1	615	603	450	90
2	100	102	500	75
3	253	301	525	410

## Sheet: DataSet_6
Row	0	1	2	3
0	920	630	410	95
1	65	60	45	90
2	390	445	530	715
3	235	305	558	404

## Sheet: DataSet_7
Row	0	1	2	3
0	80	80	230	455
1	651	360	457	390
2	307	451	503	756
3	245	330	55	30

## Sheet: DataSet_8
Row	0	1	2	3
0	70	90	30	65
1	75	80	95	990
2	390	85	90	85
3	35	70	85	90

## Sheet: DataSet_9
Row	0	1	2	3
0	750	90	20	55
1	65	60	95	90
2	30	45	30	75
3	240	390	205	49

## Sheet: DataSet_10
Row	0	1	2	3
0	10	230	220	555
1	665	660	445	990
2	320	445	550	775
3	225	330	555	440

[truncated: 1 more sheets: DataSet_11]
